# Supplementary material
Source: PubMed Central journal article supplement (PMC4955633)
Supplement: NIHMS753103-supplement-supplement_1.pdf [file NIHMS753103-supplement-supplement_1.pdf]

Supplementary Results**Table S1.** Interference suppression-related brain activity. All reported foci survive  $p_{\text{cluster-corrected}} < 0.05$ , using a cluster-forming height threshold of  $t > 3$ . Df = 45 for all reported t-statistics.

|                       |          | MNI Coordinates      |        |         |     |     |     |
|-----------------------|----------|----------------------|--------|---------|-----|-----|-----|
|                       | Sign     | Region Name          | Extent | t-value | x   | y   | z   |
| <i>Incon &gt; Con</i> | Positive | Occipital_Sup_R      | 3231   | 7.4919  | 28  | -70 | 42  |
|                       |          | Temporal_Inf_R       | 3231   | 7.0924  | 50  | -68 | -4  |
|                       |          | Occipital_Mid_R      | 3231   | 6.6951  | 44  | -76 | 18  |
|                       |          | Parietal_Inf_L       | 2522   | 6.6343  | -28 | -52 | 48  |
|                       |          | Occipital_Mid_L      | 2522   | 5.8504  | -50 | -76 | 10  |
|                       |          | Occipital_Mid_L      | 2522   | 5.6612  | -26 | -68 | 30  |
|                       |          | Frontal_Inf_Tri_L    | 389    | 6.0846  | -54 | 16  | 24  |
|                       |          | Insula_L             | 389    | 4.5544  | -34 | 18  | -6  |
|                       |          | Frontal_Sup_R        | 425    | 5.7318  | 30  | -2  | 64  |
|                       |          | Cerebelum_6_R        | 104    | 5.4896  | 8   | -64 | -20 |
|                       |          | Frontal_Mid_L        | 887    | 5.4021  | -24 | 0   | 52  |
|                       |          | Precentral_L         | 887    | 5.1968  | -56 | 0   | 34  |
|                       |          | Postcentral_L        | 887    | 4.1128  | -40 | -16 | 46  |
|                       |          | Calcarine_R          | 174    | 5.0943  | 12  | -70 | 14  |
|                       |          | Thalamus_L           | 174    | 4.8114  | -6  | -16 | 8   |
|                       |          | Frontal_Mid_R        | 101    | 4.8083  | 46  | 44  | 14  |
|                       |          | Supp_Motor_Area_L    | 358    | 4.6354  | -4  | 16  | 46  |
|                       |          | Supp_Motor_Area_R    | 358    | 4.462   | 14  | 20  | 64  |
|                       |          | Frontal_Sup_Medial_L | 96     | 4.5601  | -4  | 38  | 34  |
|                       |          | Cerebelum_6_L        | 507    | 4.4163  | -16 | -58 | -14 |
|                       |          | Calcarine_L          | 507    | 3.9751  | -16 | -68 | 6   |
|                       |          | Frontal_Inf_Oper_R   | 162    | 4.1953  | 42  | 8   | 30  |
|                       |          | Frontal_Inf_Oper_R   | 162    | 3.7499  | 54  | 16  | 16  |

**Table S2.** Response inhibition-related brain activity. All reported foci survive  $p_{\text{cluster-corrected}} < 0.05$ , using a cluster-forming height threshold of  $t > 3$ . Df = 45 for all reported t-statistics.

| MNI Coordinates       |          |                       |      |          |     |     |     |
|-----------------------|----------|-----------------------|------|----------|-----|-----|-----|
| <i>No-Go &gt; Con</i> | Positive | Occipital_Mid_L       | 1444 | 9.7458   | -18 | -96 | 6   |
|                       |          | Occipital_Inf_L       | 1444 | 6.5066   | -36 | -90 | -8  |
|                       |          | Occipital_Mid_L       | 1444 | 5.6688   | -32 | -86 | 20  |
|                       |          | SupraMarginal_R       | 1934 | 9.1366   | 60  | -44 | 28  |
|                       |          | Temporal_Mid_R        | 1934 | 7.2363   | 60  | -34 | -4  |
|                       |          | Parietal_Inf_R        | 1934 | 4.7012   | 52  | -50 | 48  |
|                       |          | Insula_R              | 2084 | 8.7593   | 28  | 20  | -10 |
|                       |          | Frontal_Inf_Tri_R     | 2084 | 6.2456   | 44  | 20  | 26  |
|                       |          | Temporal_Pole_Mid_R   | 2084 | 5.9706   | 44  | 4   | -34 |
|                       |          | Insula_L              | 1178 | 8.4486   | -32 | 18  | -6  |
|                       |          | Frontal_Inf_Orb_L     | 1178 | 4.815    | -50 | 40  | -12 |
|                       |          | Frontal_Inf_Tri_L     | 1178 | 3.4235   | -54 | 22  | 8   |
|                       |          | Supp_Motor_Area_R     | 1839 | 8.1254   | 14  | 22  | 62  |
|                       |          | Cingulum_Ant_L        | 1839 | 5.7532   | -4  | 28  | 18  |
|                       |          | Frontal_Sup_Medial_L  | 1839 | 5.5467   | 0   | 38  | 36  |
|                       |          | Calcarine_R           | 1010 | 7.5511   | 18  | -96 | 2   |
|                       |          | Angular_R             | 1010 | 5.154    | 32  | -54 | 40  |
|                       |          | Occipital_Mid_R       | 1010 | 4.5744   | 32  | -76 | 16  |
|                       |          | Frontal_Mid_R         | 465  | 6.3383   | 30  | 54  | 16  |
|                       |          | Frontal_Sup_R         | 465  | 3.2381   | 22  | 52  | 40  |
|                       |          | SupraMarginal_L       | 697  | 6.2103   | -58 | -56 | 26  |
|                       |          | Parietal_Inf_L        | 697  | 3.538    | -46 | -56 | 44  |
|                       |          | Temporal_Mid_L        | 315  | 6.202    | -48 | -32 | -2  |
|                       |          | Precentral_R          | 236  | 5.8858   | 42  | 8   | 46  |
|                       |          | Cerebelum_Crus2_L     | 173  | 5.563    | -30 | -72 | -46 |
|                       |          | Cerebelum_Crus1_L     | 173  | 4.5326   | -14 | -78 | -28 |
|                       |          | Frontal_Mid_L         | 166  | 5.477    | -28 | 46  | 32  |
|                       |          | Temporal_Inf_L        | 302  | 5.4557   | -44 | -52 | -12 |
|                       |          | Fusiform_R            | 113  | 5.2401   | 32  | -44 | -14 |
| MNI Coordinates       |          |                       |      |          |     |     |     |
| <i>No-Go &gt; Con</i> | Negative | Postcentral_L         | 5348 | -6.8058  | -46 | -24 | 50  |
|                       |          | Postcentral_L         | 5348 | -12.5033 | -36 | -24 | 54  |
|                       |          | Insula_L              | 5348 | -10.3113 | -38 | -2  | 14  |
|                       |          | SupraMarginal_L       | 5348 | -9.4929  | -50 | -24 | 16  |
|                       |          | Cerebelum_6_R         | 2842 | -10.5562 | 24  | -52 | -22 |
|                       |          | Cerebelum_8_R         | 2842 | -8.1725  | 16  | -60 | -50 |
|                       |          | Vermis_6              | 2842 | -7.3548  | 4   | -62 | -18 |
|                       |          | Postcentral_R         | 3153 | -9.2732  | 60  | -14 | 18  |
|                       |          | Precentral_R          | 3153 | -8.2395  | 62  | 6   | 22  |
|                       |          | Postcentral_R         | 3153 | -7.8226  | 56  | -16 | 42  |
|                       |          | Supp_Motor_Area_L     | 1058 | -8.3814  | -2  | -8  | 54  |
|                       |          | Cingulum_Mid_L        | 1058 | -5.9274  | -4  | 6   | 38  |
|                       |          | Location not in atlas | 1058 | -3.6471  | 16  | -10 | 38  |
|                       |          | Cerebelum_6_L         | 314  | -7.0332  | -18 | -66 | -20 |
|                       |          | Thalamus_L            | 116  | -6.6254  | -14 | -20 | 2   |
|                       |          | Frontal_Sup_R         | 191  | -4.8424  | 32  | -10 | 60  |
|                       |          | Frontal_Inf_Orb_L     | 1178 | 3.1647   | -46 | 24  | -4  |
|                       |          | Cingulum_Ant_L        | 1839 | 3.7316   | 0   | 40  | 26  |
